# Supplementary material for: Drug-induced fall risk in older patients: A pharmacovigilance study of FDA adverse event reporting system database
Source: Front Pharmacol. 2022 Nov 29;13:1044744. doi: 10.3389/fphar.2022.1044744 (PMC9746618; doi:10.3389/fphar.2022.1044744)
Supplement: Supplementary file 1 [file Table1.XLSX]

## Sheet: Sheet1
Table S1 Disproportionality analyses of odds ratio (ROR) and proportional reported ratio (PRR) for drugs
Drug Name	Drug Classification	DE	De	ROR(95%CI)	PRR(X2)
Antipsychotic drugs (N=20)
Clopenthixol	Antipsychotic	6	1	210.0(25.28-1744.44)	30.85(148.88)
Prothipendyl	Antipsychotic	11	25	15.4(7.57-31.3)	11.0(92.81)
Pipamperone	Antipsychotic	114	295	13.55(10.92-16.83)	10.05(944.6)
Oericiazine	Antipsychotic	18	65	9.69(5.75-16.34)	7.8(102.98)
Perazine	Antipsychotic	5	21	8.33(3.14-22.1)	6.92(20.32)
Melperone	Antipsychotic	57	248	8.05(6.03-10.74)	6.73(280.05)
Etifoxine	Antipsychotic	9	63	5.0(2.48-10.05)	4.5(21.72)
Tiapride	Antipsychotic	51	363	4.92(3.67-6.59)	4.43(136.05)
Levosulpiride	Antipsychotic	4	35	3.99(1.42-11.25)	3.69(5.54)
Cyamemazine	Antipsychotic	27	251	3.76(2.53-5.6)	3.49(46.96)
Loxapine	Antipsychotic	28	266	3.68(2.49-5.44)	3.42(47.07)
Cariprazine	Antipsychotic	6	57	3.68(1.58-8.54)	3.42(8.26)
Chlorprothixene	Antipsychotic	4	38	3.68(1.31-10.32)	3.42(4.79)
Thioridazine	Antipsychotic	13	136	3.34(1.89-5.91)	3.14(17.37)
Sulpiride	Antipsychotic	49	569	3.01(2.25-4.03)	2.85(58.83)
Pimavanserin	Antipsychotic	569	7108	2.82(2.59-3.08)	2.69(611.74)
Risperidone	Antipsychotic	502	6567	2.69(2.46-2.95)	2.57(489.94)
Olanzapine	Antipsychotic	446	6382	2.46(2.23-2.71)	2.36(356.49)
Zuclopenthixol	Antipsychotic	7	100	2.44(1.13-5.27)	2.35(4.3)
Quetiapine	Antipsychotic	928	14094	2.33(2.18-2.49)	2.25(648.11)
Antidepressant Drugs (N=19)
Agomelatine	Antidepressant	27	99	9.54(6.23-14.61)	7.71(155.44)
Opipramol	Antidepressant	25	131	6.68(4.35-10.25)	5.77(96.52)
Flupentixol	Antidepressant	13	81	5.61(3.12-10.09)	4.97(38.51)
Moclobemide	Antidepressant	8	58	4.82(2.3-10.11)	4.36(18.01)
Trimipramine	Antidepressant	24	181	4.64(3.03-7.1)	4.21(57.26)
Mianserin	Antidepressant	84	672	4.38(3.49-5.49)	4.0(191.38)
Meprobamate	Antianxiety	18	187	3.36(2.07-5.46)	3.16(25.17)
Citalopram	Antidepressant	843	10804	2.76(2.57-2.97)	2.63(862.87)
Mirtazapine	Antidepressant	674	8939	2.66(2.46-2.88)	2.54(640.42)
Escitalopram	Antidepressant	941	13461	2.48(2.32-2.65)	2.38(758.16)
Amitriptyline	Antidepressant	476	6829	2.45(2.23-2.69)	2.36(378.39)
Maprotiline	Antidepressant	8	118	2.37(1.15-4.85)	2.28(4.7)
Nortriptyline	Antidepressant	105	1567	2.34(1.92-2.86)	2.26(74.7)
Imipramine	Antidepressant	35	529	2.31(1.64-3.26)	2.23(23.28)
Sertraline	Antidepressant	1028	15982	2.28(2.14-2.43)	2.2(678.16)
Duloxetine	Antidepressant	883	13979	2.23(2.08-2.39)	2.16(555.01)
Doxepin	Antidepressant	57	900	2.21(1.69-2.89)	2.14(34.64)
Paroxetine	Antidepressant	541	9042	2.1(1.93-2.3)	2.04(292.54)
Venlafaxine	Antidepressant	572	9718	2.07(1.9-2.25)	2.01(295.61)
Antiparkinsonian drugs (N=20)
Piribedil	Antiparkinsonian	22	42	18.34(10.94-30.72)	12.37(225.02)
Procyclidine	Antiparkinsonian	27	87	10.86(7.05-16.73)	8.53(176.82)
Tropatepine	Antiparkinsonian	17	55	10.82(6.28-18.64)	8.5(108.11)
Benserazide	Antiparkinsonian	174	1306	4.67(3.99-5.48)	4.24(438.86)
Carbidopa/Levodopa	Antiparkinsonian	913	7305	4.45(4.15-4.77)	4.06(2120.86)
Carbidopa/Levodopa/Entacapone	Antiparkinsonian	182	1472	4.34(3.72-5.06)	3.97(411.75)
Tolcapone	Antiparkinsonian	8	68	4.11(1.97-8.56)	3.78(14.14)
Rasagiline	Antiparkinsonian	235	2043	4.04(3.53-4.62)	3.72(477.18)
Carbidopa	Antiparkinsonian	1283	11384	4.03(3.8-4.28)	3.73(2553.25)
Levodopa	Antiparkinsonian	1463	13124	4(3.79-4.23)	3.7(2865.58)
Entacapone	Antiparkinsonian	274	2558	3.76(3.32-4.26)	3.49(497.17)
Apomorphine	Antiparkinsonian	183	1960	3.27(2.81-3.81)	3.08(261.61)
Opicapone	Antiparkinsonian	12	130	3.23(1.78-5.83)	3.04(14.88)
Istradefylline	Antiparkinsonian	9	101	3.11(1.57-6.16)	2.94(9.97)
Biperiden	Antiparkinsonian	42	478	3.07(2.24-4.21)	2.9(52.13)
Rotigotine	Antiparkinsonian	157	2082	2.64(2.24-3.11)	2.52(147.26)
Cabergoline	Antiparkinsonian	32	457	2.45(1.71-3.5)	2.35(24.3)
Pramipexole	Antiparkinsonian	288	4588	2.2(1.95-2.48)	2.13(176.1)
Trihexyphenidyl	Antiparkinsonian	28	465	2.1(1.43-3.08)	2.04(14.31)
Ropinirole	Antiparkinsonian	282	4751	2.08(1.84-2.35)	2.02(148.16)
Central Nervous System Drugs (N=14)
Lutetium 177	Central Nervous System Agent	3	11	9.54(2.66-34.21)	7.71(11.78)
Oxybate	Central Nervous System Agent	166	1093	5.33(4.52-6.28)	4.76(501.42)
Codergocrine	Central Nervous System Agent	4	28	4.99(1.75-14.25)	4.49(7.88)
Dalfampridine	Central Nervous System Agent	303	2508	4.25(3.77-4.79)	3.9(664.55)
Ergoloid	Central Nervous System Agent	6	57	3.68(1.58-8.54)	3.42(8.26)
Dextroamphetamine/Amphetamine	Central Nervous System Agent	19	194	3.42(2.14-5.49)	3.21(27.52)
Rivastigmine	Central Nervous System Agent	784	8203	3.39(3.14-3.65)	3.18(1181.24)
Donepezil	Central Nervous System Agent	800	10670	2.65(2.47-2.85)	2.54(752.21)
Galantamine	Central Nervous System Agent	167	2221	2.63(2.25-3.08)	2.52(155.78)
Memantine	Central Nervous System Agent	641	8682	2.6(2.4-2.82)	2.49(581.66)
Teriflunomide	Central Nervous System Agent	89	1266	2.46(1.98-3.05)	2.36(70.73)
Valbenazine	Central Nervous System Agent	162	2303	2.46(2.1-2.89)	2.37(130.17)
Modafinil	Central Nervous System Agent	69	986	2.45(1.92-3.12)	2.35(53.94)
Glatiramer	Central Nervous System Agent	132	1978	2.33(1.96-2.79)	2.25(93.33)
Lanreotide	Central Nervous System Agent	38	602	2.21(1.59-3.06)	2.13(22.5)
Melatonin	Central Nervous System Agent	96	1559	2.15(1.75-2.65)	2.09(54.92)
Hypnotic Sedative Drugs (N=13)
Ketazolam	Hypnotic and sedative-Benzodiazepine	3	8	13.12(3.48-49.47)	9.81(16.2)
Clomethiazole	Hypnotic and sedative	15	84	6.25(3.6-10.82)	5.45(51.63)
prazepam	Hypnotic and sedative-Benzodiazepine	66	377	6.13(4.72-7.97)	5.36(236.54)
Clobazam	Hypnotic and sedative-Benzodiazepine	52	341	5.34(3.98-7.15)	4.76(155.19)
Oxazepam	Hypnotic and sedative-Benzodiazepine	359	2724	4.64(4.15-5.18)	4.21(895.92)
nitrazepam	Hypnotic and sedative-Benzodiazepine	50	403	4.34(3.23-5.83)	3.97(111.41)
Lormetazepam	Hypnotic and sedative-Benzodiazepine	58	549	3.7(2.82-4.85)	3.44(100.76)
Zopiclone	Hypnotic and sedative	398	4231	3.31(2.98-3.67)	3.11(580.16)
Bromazepam	Hypnotic and sedative-Benzodiazepine	177	1983	3.13(2.68-3.65)	2.95(232.95)
Flurazepam	Hypnotic and sedative-Benzodiazepine	29	359	2.82(1.93-4.12)	2.69(29.97)
Zolpidem	Hypnotic and sedative	980	13279	2.62(2.45-2.79)	2.51(892.31)
Estazolam	Hypnotic and sedative-Benzodiazepine	16	223	2.51(1.51-4.17)	2.41(12.16)
Clotiazepam	Hypnotic and sedative-Antianxiety	12	200	2.1(1.17-3.76)	2.03(5.49)
Anticonvulsive Drug (N=13)
Secobarbital	Anticonvulsant	4	8	17.49(5.26-58.11)	11.99(30.93)
Valpromide	Anticonvulsant	29	100	10.15(6.71-15.35)	8.09(178.19)
Cannabidiol	Anticonvulsant	6	39	5.38(2.27-12.71)	4.79(14.86)
Clorazepate	Anticonvulsant	108	943	4.01(3.29-4.9)	3.7(216.14)
Perampanel	Anticonvulsant	16	148	3.78(2.25-6.33)	3.51(27.04)
Eslicarbazepine	Anticonvulsant	11	117	3.29(1.77-6.1)	3.09(13.94)
Primidone	Anticonvulsant	85	916	3.25(2.6-4.06)	3.06(118.95)
Divalproex	Anticonvulsant	117	1543	2.65(2.2-3.2)	2.54(110.61)
Oxcarbazepine	Anticonvulsant	84	1291	2.27(1.82-2.84)	2.2(55.3)
Phenytoin	Anticonvulsant	267	4262	2.2(1.94-2.49)	2.12(162.28)
Lorazepam	Anticonvulsant	927	14912	2.2(2.05-2.35)	2.13(559.22)
Clonazepam	Anticonvulsant	562	9074	2.18(2-2.37)	2.11(333.84)
Carbamazepine	Anticonvulsant	281	4658	2.11(1.87-2.39)	2.05(154.42)
Antihypertensive drugs (N=12)
Aliskiren/Hydrochlorothiazide	Antihypertensive	8	37	7.56(3.52-16.25)	6.4(32.13)
Benidipine	Antihypertensive	30	468	2.24(1.55-3.24)	2.16(18.24)
Rilmenidine	Antihypertensive	37	399	3.24(2.31-4.54)	3.05(50.51)
Reserpine	Antihypertensive	3	19	5.52(1.63-18.67)	4.9(6)
Nicardipine	Antihypertensive	55	723	2.66(2.02-3.5)	2.54(51.49)
Nimodipine	Antihypertensive	11	127	3.03(1.63-5.61)	2.86(11.92)
Nitrendipine	Antihypertensive	49	360	4.76(3.53-6.42)	4.31(124.88)
Perindopril	Antihypertensive	434	6633	2.3(2.08-2.53)	2.22(296.11)
Trandolapril	Antihypertensive	48	744	2.25(1.68-3.02)	2.18(30.4)
Cilazapril	Antihypertensive	18	189	3.33(2.05-5.4)	3.13(24.69)
Amlodipine/Valsartan	Antihypertensive	95	1392	2.39(1.94-2.94)	2.3(70.51)
Valsartan/Hydrochlorothiazide	Antihypertensive	99	1668	2.07(1.69-2.54)	2.01(51.21)
The others (N=145)
Anethole Trithione	Miscellaneous Drugs and Other Substances	12	2	210.03(47-938.49)	30.86(326.49)
Anisotropine	Anticholinergic	3	1	104.99(10.92-1009.42)	26.99(52.82)
Fluprednidene	Corticosteroid	4	2	69.99(12.82-382.18)	23.99(68.56)
Potassium Hydroxide	Nutritive Agent	4	2	69.99(12.82-382.18)	23.99(68.56)
Cysteamine	Ophthalmologic Agent	5	5	34.99(10.13-120.9)	17.99(66)
Propolis	Antibacterial	4	5	27.99(7.51-104.27)	15.99(43.45)
Tiludronate Disodium	Calcium Regulator	3	4	26.24(5.87-117.28)	15.42(28.11)
Erdosteine	Cough Suppressants Expectorants Mucolytics and Nasal Decongestants	6	10	21(7.63-57.78)	13.5(59.14)
Tenoxicam	Analgesic	13	26	17.5(8.99-34.06)	12(123.73)
Perhexiline	Cardiovascular Drugs	8	18	15.55(6.76-35.77)	11.07(65.41)
Alprenolol	Adrenergic Blocker	3	7	14.99(3.87-58)	10.79(18.28)
Acrivastine	Antihistamine	6	15	14(5.43-36.08)	10.28(42.61)
Prucalopride	Antiemetic	18	54	11.66(6.84-19.89)	9(123.54)
Troglitazone	Antidiabetic	6	18	11.66(4.63-29.39)	9(36.03)
Itopride	Antiemetic	9	28	11.25(5.3-23.84)	8.75(55.86)
Pegaspargase	Antineoplastic Agent	7	28	8.75(3.82-20.03)	7.2(32.32)
Docusate Sodium/Glycerin/Mineral Oil	Laxative	5	20	8.74(3.28-23.31)	7.19(21.44)
Naproxen/Esomeprazole magnesium	NA	5	22	7.95(3.01-21)	6.66(19.28)
Mogamulizumab-kpkc	Antineoplastic Agent	7	32	7.65(3.37-17.34)	6.46(27.85)
Taliglucerase Alfa	Enzyme	5	23	7.6(2.89-20.01)	6.42(18.31)
Acetaminophen/Dextromethorphan/Guaifenesin/Doxylamine succinate/Oxymetazoline and/or Phenylephrine	NA	5	23	7.6(2.89-20.01)	6.42(18.31)
Indoramin	alpha-Blocker	5	23	7.6(2.89-20.01)	6.42(18.31)
Alogliptin Benzoate/Pioglitazone	NA	3	14	7.49(2.15-26.09)	6.35(8.95)
Lumiracoxib	Analgesic	3	14	7.49(2.15-26.09)	6.35(8.95)
Nusinersen	Musculoskeletal Agent	3	14	7.49(2.15-26.09)	6.35(8.95)
DiphenidolL/Difenidol	Antivertigo	11	57	6.75(3.54-12.88)	5.82(40.37)
Brinzolamide/Brimonidine	NA	3	17	6.17(1.8-21.07)	5.39(6.99)
Tucatinib	Antineoplastic Agent	4	23	6.08(2.1-17.6)	5.33(10.36)
Tilidine	Analgesic	73	432	5.92(4.62-7.59)	5.21(250.73)
Acetylleucine	Antihistamine	34	209	5.69(3.96-8.18)	5.03(109.03)
Magnesium Gluconate	Mineral Supplement	6	41	5.12(2.17-12.06)	4.59(13.85)
Insulin Glargine (recombinant)/Lixisenatide	NA	3	21	4.99(1.49-16.76)	4.49(5.18)
Coagulation Factor Xa (recombinant)	Blood Modifier Agent	4	28	4.99(1.75-14.25)	4.49(7.88)
Trimebutine	Antispasmodic	22	156	4.93(3.15-7.71)	4.45(57.01)
Opium	Analgesic	33	235	4.91(3.41-7.08)	4.43(86.73)
Octreotide	Antidote	614	4532	4.79(4.4-5.22)	4.34(1598.55)
Amdinocillin	Antibiotic	3	22	4.77(1.42-15.94)	4.31(4.82)
Naltrexone/Bupropion	NA	23	172	4.68(3.02-7.23)	4.24(55.41)
Etidronate Disodium	Calcium Regulator	27	204	4.63(3.1-6.92)	4.2(64.65)
Imiglucerase	Enzyme	67	509	4.61(3.57-5.95)	4.19(163.97)
Fluticasone/Vilanterol Trifenatate	NA	4	31	4.51(1.59-12.79)	4.11(6.75)
Teriparatide	Calcium Regulator	4391	37279	4.49(4.35-4.64)	4.12(9557.25)
Aceprometazine	Antiemetic	5	39	4.48(1.76-11.38)	4.09(9.03)
Ferrous Gluconate	Iron Supplement	62	485	4.47(3.43-5.83)	4.08(145.17)
Oryctolagus Cuniculus Skin	Allergy Testing	3	24	4.37(1.31-14.52)	3.99(4.19)
Emicizumab-kxwh	Antihemophilic Agent	8	65	4.3(2.06-8.97)	3.94(15.18)
Trimeprazine	Antiemetic	50	414	4.23(3.15-5.67)	3.88(106.97)
Interferon Beta-1a	Immune Stimulant	1495	12883	4.17(3.95-4.41)	3.84(3118.42)
Romosozumab-aqqg	Calcium Regulator	92	774	4.16(3.35-5.17)	3.83(194.57)
Carboxypolymethylene	NA	21	177	4.15(2.64-6.53)	3.81(42.07)
Montmorillonite	Intestinal Pain and Diarrhea	12	101	4.15(2.28-7.56)	3.82(22.9)
Oxycodone/Aspirin	NA	5	43	4.06(1.61-10.27)	3.74(7.73)
Levorphanol	Analgesic	5	43	4.06(1.61-10.27)	3.74(7.73)
Amantadine	Anticholinergic	213	1869	4(3.47-4.61)	3.69(425.96)
Insulin Aspart (recombinant)	Antidiabetic	8	70	4(1.92-8.31)	3.69(13.5)
Amoxicillin/Clavulanate Potassium	NA	95	839	3.96(3.2-4.9)	3.66(186.4)
Fingolimod	Immune Modulator	173	1548	3.92(3.35-4.59)	3.62(334.86)
Urapidil	alpha-Blocker	67	600	3.91(3.03-5.03)	3.62(127.78)
Sodium gluconate/Magnesium	NA	6	54	3.88(1.67-9.03)	3.59(9.06)
Molsidomine	Cardiovascular Drugs	33	298	3.87(2.7-5.55)	3.59(60.76)
Metamizole	Analgesic	341	3119	3.84(3.44-4.3)	3.56(640.54)
Nadroparin	Cardiovascular Drugs	22	201	3.83(2.46-5.95)	3.55(38.89)
Pivmecillinam	Antibiotic	6	55	3.81(1.64-8.86)	3.54(8.78)
Natalizumab	Immune Modulator	586	5552	3.73(3.42-4.06)	3.47(1043.1)
Amisulpride	Antiemetic	27	254	3.72(2.5-5.53)	3.46(46.05)
Dimenhydrinate	Antihistamine	35	331	3.7(2.61-5.24)	3.44(59.9)
Luspatercept-aamt	Blood Modifier Agent	4	38	3.68(1.31-10.32)	3.42(4.79)
Proguanil	Antimalarial	10	95	3.68(1.92-7.06)	3.42(15.28)
Alendronate	Calcium Regulator	2869	29534	3.58(3.44-3.72)	3.35(4526.6)
Certoparin	Cardiovascular Drugs	8	78	3.58(1.73-7.43)	3.34(11.24)
Abarelix	Antiandrogen	4	40	3.49(1.25-9.78)	3.27(4.36)
Caffeine/Acetaminophen/Codeine	NA	4	40	3.49(1.25-9.78)	3.27(4.36)
Bretylium	Adrenergic Blocker	14	141	3.47(2-6.01)	3.25(20.19)
Glycine	Amino Acid Supplement	8	81	3.45(1.67-7.14)	3.23(10.51)
Isophane Protamine Biosynthetic Insulin	Antidiabetic	5	51	3.43(1.36-8.59)	3.21(5.73)
Propyphenazone	Analgesic	5	51	3.43(1.36-8.59)	3.21(5.73)
Trospium Chloride	Anticholinergic	87	891	3.42(2.74-4.26)	3.2(133.34)
Elvitegravir/Cobicistat/Emtricitabine/Tenofovir Alafenamide	NA	8	82	3.41(1.65-7.05)	3.2(10.28)
Carbamide Peroxide	Antibacteria	5	52	3.36(1.34-8.42)	3.15(5.52)
Magaldrate	Antacid	5	52	3.36(1.34-8.42)	3.15(5.52)
Midodrine	Adrenergic Agonist	100	1053	3.32(2.71-4.08)	3.12(146.28)
Prazosin	Adrenergic Blocker	47	497	3.31(2.45-4.46)	3.11(67.07)
Dexketoprofen	Analgesic	12	131	3.2(1.77-5.79)	3.02(14.67)
Ferrous Fumarate	Iron Supplement	93	1043	3.12(2.52-3.86)	2.95(121.13)
Betahistine	Antivertigo	72	829	3.04(2.39-3.87)	2.87(88.78)
Carteolol	Adrenergic Blocker	13	150	3.03(1.72-5.34)	2.87(14.43)
Insulin Lispro Protamine (recombinant)/Insulin Lispro (recombinan)	NA	40	462	3.03(2.19-4.18)	2.87(48.17)
Aloe Vera	Dermatological Drugs and Sunscreens	7	82	2.98(1.38-6.46)	2.83(6.74)
Fludrocortisone	Corticosteroid	92	1089	2.96(2.39-3.66)	2.8(108.07)
Droxidopa	Adrenergic	369	4404	2.94(2.65-3.28)	2.79(433.07)
Cranberry	Allergy Testing	18	215	2.93(1.81-4.74)	2.78(19.32)
Bambuterol	Bronchodilator	6	72	2.91(1.26-6.7)	2.76(5.27)
Gliquidone	Antidiabetic	6	72	2.91(1.26-6.7)	2.76(5.27)
Polyethylene Glycol 4000	Laxative	22	265	2.9(1.88-4.49)	2.76(23.6)
Alglucosidase Alfa	Enzyme	13	158	2.87(1.63-5.07)	2.73(13)
Insulin Degludec and Insulin Aspart Injection	NA	10	123	2.84(1.49-5.42)	2.7(9.38)
Risedronate	Calcium Regulator	718	8964	2.83(2.62-3.06)	2.69(774.38)
Econazole	Antifungal	20	248	2.82(1.78-4.45)	2.68(20.07)
Cefpodoxime Proxetil	Antibiotic	15	189	2.77(1.64-4.7)	2.64(14.16)
Quinine	Antimalarial	106	1346	2.76(2.26-3.36)	2.63(108.37)
Acebutolol	Adrenergic Blocker	74	942	2.75(2.17-3.48)	2.62(74.74)
Polaprezinc	Gastrointestinal Drugs	8	102	2.74(1.33-5.63)	2.61(6.64)
Ocrelizumab	Immune Modulator	32	410	2.73(1.9-3.91)	2.6(30.95)
Thyroxin	Thyroid and Antithyroid Drugs	10	129	2.71(1.42-5.16)	2.58(8.46)
Maxacalcitol	Nutritive Agent	9	117	2.69(1.36-5.3)	2.57(7.34)
Upadacitinib	Musculoskeletal Agent	22	290	2.65(1.72-4.09)	2.53(19.54)
Torsemide	Diuretic	885	11873	2.64(2.46-2.83)	2.53(822.53)
Cyproheptadine	Antihistamine	12	163	2.57(1.43-4.63)	2.46(9.32)
Risankizumab-rzaa	Antipsoriatic	18	246	2.56(1.58-4.13)	2.45(14.49)
Naloxone	Antidote	112	1531	2.56(2.11-3.1)	2.45(97.83)
Atovaquone/Proguanil	NA	8	110	2.54(1.24-5.21)	2.44(5.59)
Ibandronate	Calcium Regulator	482	6791	2.5(2.27-2.74)	2.4(399.5)
Lactulose	Laxative	207	2922	2.48(2.15-2.86)	2.38(169.53)
Insulin Human Isophane (NPH)	Antidiabetic	147	2101	2.45(2.07-2.9)	2.35(116.52)
Procaterol	Bronchodilator	7	100	2.44(1.13-5.27)	2.35(4.3)
Codeine/Guaifenesin	NA	19	272	2.44(1.53-3.89)	2.35(13.8)
Ergocalciferol	Nutritive Agent	443	6395	2.43(2.21-2.68)	2.34(346.9)
Meclizine	Antihistamine	117	1698	2.41(2-2.91)	2.32(89.17)
Bisacodyl	Laxative	62	909	2.38(1.84-3.09)	2.3(45.47)
Zafirlukast	Antiasthma	22	323	2.38(1.54-3.67)	2.29(15.24)
Aspirin/Butalbital/Caffeine	NA	13	192	2.36(1.35-4.15)	2.28(8.36)
Pioglitazone/Metformin	NA	10	148	2.36(1.24-4.48)	2.27(6.12)
Calcitonin	Calcium Regulator	140	2097	2.34(1.97-2.77)	2.25(99.18)
Celiprolol	Adrenergic Blocker	12	179	2.34(1.3-4.2)	2.26(7.43)
Fenoterol	Bronchodilator	18	271	2.32(1.44-3.74)	2.24(11.49)
Desmopressin	Blood Modifier Agent	33	501	2.3(1.62-3.28)	2.22(21.64)
Bilastine	Antihistamine	9	138	2.28(1.16-4.48)	2.2(4.91)
Selexipag	Blood Modifier Agent	230	3530	2.28(2-2.61)	2.2(154.35)
Vitamin D	Nutritive Agent	916	14287	2.27(2.12-2.43)	2.19(598.43)
Lafutidine	Gastrointestinal Drugs	9	140	2.24(1.14-4.41)	2.17(4.72)
Tolevamer	Hyperkalemia	14	219	2.23(1.3-3.84)	2.16(7.84)
Plantago seed	Natural Health Products.	32	509	2.2(1.53-3.14)	2.13(18.57)
Oxybutynin	Anticholinergic	258	4145	2.18(1.92-2.47)	2.11(154.12)
Polyvinyl Alcohol	Ophthalmologic Agent	13	208	2.18(1.24-3.83)	2.11(6.77)
Raloxifene	Antineoplastic Agent	327	5252	2.18(1.95-2.44)	2.11(195.95)
Siponimod	Immune Modulator	18	288	2.18(1.35-3.52)	2.11(9.8)
Isopropyl Alcohol	Antiseptic	1020	16582	2.18(2.04-2.32)	2.11(599.12)
Indapamide	Diuretic	248	3979	2.18(1.92-2.48)	2.11(148.61)
Cyclobenzaprine	Musculoskeletal Agent	186	2994	2.17(1.87-2.52)	2.11(110.13)
Trimethobenzamide	Antiemetic	33	532	2.17(1.52-3.08)	2.1(18.51)
Riociguat	Cardiovascular Drugs	255	4145	2.16(1.9-2.45)	2.09(147.64)
Plantago Ovata seed	Laxative	10	162	2.16(1.14-4.09)	2.09(4.79)
Pilsicainide	Cardiovascular Drugs	14	233	2.1(1.22-3.6)	2.04(6.6)
Carbimazole	Thyroid and Antithyroid Drugs	26	436	2.08(1.4-3.1)	2.02(12.85)
Cholecalciferol	Nutritive Agent	1520	26031	2.08(1.97-2.19)	2.02(778.8)
